# Supplementary material for: Estimation of Acetic Acid Concentration from Biogas Samples Using Machine Learning
Source: Hindawi journal article supplement (doi:10.1155/2023/2871769), 2023-02-22
Supplement: f1 [file 2871769.f1.docx]

Supplementary Material

**Estimation of acetic acid concentration from biogas sample using machine learning**

Lingga Aksara Putra, M.Sc., B.Eng.*, Bernhard Huber, M.Sc., Prof. Dr.-Ing. Matthias Gaderer

*Correspondence:* [lingga_aksara.putra@tum.de](mailto:lingga_aksara.putra@tum.de), Technical University of Munich, Professorship of Regenerative Energy Systems, Schulgasse 16, 94315, Germany

This additional information consists of all project results that cannot be presented in the main article for clarity reasons. has already been mentioned in the main article, however this project also uses , and as classification metrics. Their definitions are as follows:

(S1)

(S2)

(S3)

True Positive (TP), True Negative (TN), False Positive (FP) and False Negative (FN) can be obtained from the confusion matrix **Tab. 6** from the main article. **Tab. S1** – **S7** and **Fig. S1** – **S35** display classification metrics and learning curves from all sensors, data and machine learning models.

**Table S1.** Classification metrics for Logistic Regression model.

| Classification  metric | Sensor | Data | Mean | Std. deviation |
| --- | --- | --- | --- | --- |
| Accuracy | S1.4 | Training | 52.2 % | 2.1 % |
| Test | 47.6 % | 6.1 % |
| S1.7 | Training | 53.5 % | 1.6 % |
| Test | 46,9% | 6,6% |
| S2.0 | Training | 52,2% | 2,3% |
| Test | 49,8% | 6,0% |
| S2.2 | Training | 58,7% | 3,2% |
| Test | 56,1% | 6,0% |
| All sensors | Training | 56,5% | 4,2% |
| Test | 54,1% | 6,6% |
| Recall | S1.4 | Training | 13,7% | 24,1% |
| Test | 10,8% | 22,6% |
| S1.7 | Training | 23,2% | 23,1% |
| Test | 20,7% | 23,1% |
| S2.0 | Training | 92,6% | 19,8% |
| Test | 92,6% | 20,6% |
| S2.2 | Training | 49,6% | 2,6% |
| Test | 46,8% | 9,2% |
| All sensors | Training | 65,5% | 3,1% |
| Test | 64,8% | 10,5% |
| Precision | S1.4 | Training | 23,8% | 24,0% |
| Test | 13,0% | 17,2% |
| S1.7 | Training | 40,6% | 23,0% |
| Test | 30,9% | 22,0% |
| S2.0 | Training | 53,3% | 6,9% |
| Test | 50,0% | 8,9% |
| S2.2 | Training | 58,6% | 2,9% |
| Test | 55,8% | 12,8% |
| All sensors | Training | 57,9% | 3,6% |
| Test | 55,7% | 8,7% |
| F1 score | S1.4 | Training | 14,6% | 20,1% |
| Test | 9,4% | 14,6% |
| S1.7 | Training | 26,5% | 20,1% |
| Test | 21,4% | 18,2% |
| S2.0 | Training | 65,6% | 11,4% |
| Test | 64,0% | 12,1% |
| S2.2 | Training | 53,6% | 1,9% |
| Test | 49,7% | 7,1% |
| All sensors | Training | 61,3% | 2,2% |
| Test | 59,0% | 6,8% |

**Table S2.** Classification metrics for Decision Tree model.

| Classification  metric | Sensor | Data | Mean | Std. deviation |
| --- | --- | --- | --- | --- |
| Accuracy | S1.4 | Training | 77,2% | 2,7% |
| Test | 66,7% | 7,1% |
| S1.7 | Training | 72,7% | 5,0% |
| Test | 56,4% | 7,7% |
| S2.0 | Training | 76,7% | 2,2% |
| Test | 61,2% | 7,0% |
| S2.2 | Training | 80,1% | 3,4% |
| Test | 66,0% | 5,4% |
| All sensors | Training | 83,8% | 4,7% |
| Test | 70,6% | 6,5% |
| Recall | S1.4 | Training | 60,6% | 12,5% |
| Test | 51,6% | 14,7% |
| S1.7 | Training | 58,6% | 17,5% |
| Test | 42,7% | 18,1% |
| S2.0 | Training | 78,8% | 9,6% |
| Test | 66,1% | 14,8% |
| S2.2 | Training | 84,9% | 9,3% |
| Test | 70,9% | 14,5% |
| All sensors | Training | 84,9% | 9,6% |
| Test | 71,1% | 15,4% |
| Precision | S1.4 | Training | 91,3% | 9,9% |
| Test | 73,0% | 15,2% |
| S1.7 | Training | 81,9% | 10,3% |
| Test | 58,7% | 15,0% |
| S2.0 | Training | 78,4% | 6,0% |
| Test | 62,8% | 9,3% |
| S2.2 | Training | 77,2% | 6,1% |
| Test | 63,1% | 9,4% |
| All sensors | Training | 86,0% | 8,9% |
| Test | 73,2% | 9,9% |
| F1 score | S1.4 | Training | 71,2% | 5,0% |
| Test | 58,4% | 9,7% |
| S1.7 | Training | 65,8% | 10,8% |
| Test | 47,0% | 13,4% |
| S2.0 | Training | 77,8% | 2,9% |
| Test | 63,1% | 8,1% |
| S2.2 | Training | 80,3% | 3,9% |
| Test | 65,4% | 8,3% |
| All sensors | Training | 84,6% | 4,3% |
| Test | 70,5% | 8,8% |

**Table S3.** Classification metrics for k-Nearest-Neighbors model.

| Classification  metric | Sensor | Data | Mean | Std. deviation |
| --- | --- | --- | --- | --- |
| Accuracy | S1.4 | Training | 78,4% | 1,6% |
| Test | 67,2% | 5,9% |
| S1.7 | Training | 75,8% | 2,1% |
| Test | 59,8% | 7,0% |
| S2.0 | Training | 74,9% | 1,7% |
| Test | 63,0% | 5,5% |
| S2.2 | Training | 78,8% | 1,5% |
| Test | 70,5% | 6,1% |
| All sensors | Training | 86,0% | 1,5% |
| Test | 79,0% | 5,2% |
| Recall | S1.4 | Training | 75,4% | 3,2% |
| Test | 62,9% | 9,5% |
| S1.7 | Training | 78,0% | 4,2% |
| Test | 58,9% | 10,7% |
| S2.0 | Training | 77,9% | 3,0% |
| Test | 69,9% | 8,8% |
| S2.2 | Training | 80,5% | 2,6% |
| Test | 70,5% | 9,6% |
| All sensors | Training | 87,7% | 2,0% |
| Test | 80,1% | 8,4% |
| Precision | S1.4 | Training | 78,5% | 2,4% |
| Test | 65,8% | 10,6% |
| S1.7 | Training | 73,2% | 2,4% |
| Test | 59,8% | 10,6% |
| S2.0 | Training | 75,2% | 2,1% |
| Test | 63,3% | 6,9% |
| S2.2 | Training | 76,6% | 2,1% |
| Test | 68,7% | 9,8% |
| All sensors | Training | 86,0% | 2,1% |
| Test | 79,9% | 8,0% |
| F1 score | S1.4 | Training | 76,8% | 2,1% |
| Test | 63,8% | 8,3% |
| S1.7 | Training | 75,4% | 2,5% |
| Test | 58,5% | 8,3% |
| S2.0 | Training | 76,5% | 1,6% |
| Test | 66,0% | 5,6% |
| S2.2 | Training | 78,5% | 1,7% |
| Test | 69,0% | 7,4% |
| All sensors | Training | 86,8% | 1,4% |
| Test | 79,6% | 5,6% |

**Table S4.** Classification metrics for Linear Discriminant Analysis model.

| Classification  metric | Sensor | Data | Mean | Std. deviation |
| --- | --- | --- | --- | --- |
| Accuracy | S1.4 | Training | 52,1% | 2,2% |
| Test | 46,9% | 5,6% |
| S1.7 | Training | 59,4% | 2,1% |
| Test | 51,7% | 6,3% |
| S2.0 | Training | 56,0% | 2,4% |
| Test | 55,1% | 6,0% |
| S2.2 | Training | 61,0% | 2,1% |
| Test | 57,0% | 6,9% |
| All sensors | Training | 70,0% | 1,8% |
| Test | 65,9% | 5,7% |
| Recall | S1.4 | Training | 16,1% | 24,0% |
| Test | 12,7% | 22,5% |
| S1.7 | Training | 55,6% | 9,5% |
| Test | 49,5% | 13,5% |
| S2.0 | Training | 73,7% | 7,9% |
| Test | 74,9% | 10,0% |
| S2.2 | Training | 50,5% | 5,5% |
| Test | 46,5% | 11,1% |
| All sensors | Training | 75,0% | 2,9% |
| Test | 73,0% | 9,7% |
| Precision | S1.4 | Training | 25,9% | 23,1% |
| Test | 15,5% | 16,9% |
| S1.7 | Training | 57,6% | 2,3% |
| Test | 51,7% | 9,5% |
| S2.0 | Training | 56,1% | 2,0% |
| Test | 55,8% | 7,8% |
| S2.2 | Training | 61,6% | 2,5% |
| Test | 57,4% | 14,1% |
| All sensors | Training | 70,1% | 1,8% |
| Test | 65,6% | 7,7% |
| F1 score | S1.4 | Training | 17,5% | 20,6% |
| Test | 11,6% | 15,3% |
| S1.7 | Training | 56,3% | 5,8% |
| Test | 49,2% | 8,2% |
| S2.0 | Training | 63,6% | 4,0% |
| Test | 63,1% | 5,1% |
| S2.2 | Training | 55,3% | 3,7% |
| Test | 50,0% | 8,3% |
| All sensors | Training | 72,4% | 1,8% |
| Test | 68,6% | 6,3% |

**Table S5.** Classification metrics for Gaussian Naïve Bayes model.

| Classification  metric | Sensor | Data | Mean | Std. deviation |
| --- | --- | --- | --- | --- |
| Accuracy | S1.4 | Training | 53,5% | 3,1% |
| Test | 48,8% | 5,7% |
| S1.7 | Training | 53,7% | 1,4% |
| Test | 46,3% | 5,6% |
| S2.0 | Training | 50,7% | 3,3% |
| Test | 45,6% | 6,3% |
| S2.2 | Training | 62,5% | 1,7% |
| Test | 60,9% | 6,0% |
| All sensors | Training | 60,5% | 2,6% |
| Test | 57,6% | 7,2% |
| Recall | S1.4 | Training | 29,7% | 27,2% |
| Test | 27,8% | 26,4% |
| S1.7 | Training | 42,8% | 20,3% |
| Test | 37,6% | 19,8% |
| S2.0 | Training | 57,9% | 31,9% |
| Test | 54,1% | 31,0% |
| S2.2 | Training | 46,2% | 2,9% |
| Test | 43,8% | 9,0% |
| All sensors | Training | 55,9% | 6,4% |
| Test | 52,1% | 10,3% |
| Precision | S1.4 | Training | 34,7% | 24,9% |
| Test | 30,5% | 22,8% |
| S1.7 | Training | 49,4% | 10,4% |
| Test | 43,5% | 13,0% |
| S2.0 | Training | 54,4% | 5,8% |
| Test | 48,5% | 10,3% |
| S2.2 | Training | 65,8% | 2,0% |
| Test | 63,6% | 11,2% |
| All sensors | Training | 64,1% | 2,5% |
| Test | 61,2% | 9,7% |
| F1 score | S1.4 | Training | 30,3% | 24,2% |
| Test | 26,1% | 20,9% |
| S1.7 | Training | 43,9% | 14,6% |
| Test | 37,5% | 14,0% |
| S2.0 | Training | 50,6% | 15,8% |
| Test | 46,1% | 16,3% |
| S2.2 | Training | 54,2% | 2,3% |
| Test | 51,0% | 7,4% |
| All sensors | Training | 59,5% | 4,4% |
| Test | 55,6% | 8,0% |

**Table S6.** Classification metrics for Support Vector Machine model.

| Classification  metric | Sensor | Data | Mean | Std. deviation |
| --- | --- | --- | --- | --- |
| Accuracy | S1.4 | Training | 56,9% | 1,8% |
| Test | 51,1% | 5,6% |
| S1.7 | Training | 54,3% | 1,5% |
| Test | 44,1% | 5,1% |
| S2.0 | Training | 60,9% | 1,3% |
| Test | 59,7% | 6,1% |
| S2.2 | Training | 64,0% | 1,8% |
| Test | 57,3% | 5,3% |
| All sensors | Training | 64,6% | 2,1% |
| Test | 62,5% | 5,8% |
| Recall | S1.4 | Training | 52,5% | 22,8% |
| Test | 48,3% | 22,6% |
| S1.7 | Training | 29,8% | 25,1% |
| Test | 23,2% | 22,7% |
| S2.0 | Training | 88,8% | 3,0% |
| Test | 88,3% | 6,9% |
| S2.2 | Training | 52,9% | 18,6% |
| Test | 46,7% | 21,7% |
| All sensors | Training | 56,7% | 8,6% |
| Test | 53,9% | 12,2% |
| Precision | S1.4 | Training | 50,9% | 18,4% |
| Test | 42,6% | 17,2% |
| S1.7 | Training | 40,5% | 25,0% |
| Test | 27,9% | 21,2% |
| S2.0 | Training | 58,4% | 1,0% |
| Test | 57,5% | 7,1% |
| S2.2 | Training | 67,2% | 4,0% |
| Test | 60,0% | 11,7% |
| All sensors | Training | 70,5% | 3,1% |
| Test | 68,5% | 10,5% |
| F1 score | S1.4 | Training | 49,7% | 19,3% |
| Test | 44,1% | 18,3% |
| S1.7 | Training | 31,7% | 22,7% |
| Test | 22,5% | 18,2% |
| S2.0 | Training | 70,4% | 1,3% |
| Test | 69,2% | 5,4% |
| S2.2 | Training | 56,9% | 9,4% |
| Test | 48,3% | 10,4% |
| All sensors | Training | 62,5% | 4,0% |
| Test | 59,2% | 7,8% |

**Table S7.** Classification metrics for Random Forest model.

| Classification  metric | Sensor | Data | Mean | Std. deviation |
| --- | --- | --- | --- | --- |
| Accuracy | S1.4 | Training | 83,8% | 1,8% |
| Test | 69,2% | 6,8% |
| S1.7 | Training | 87,7% | 2,2% |
| Test | 58,2% | 6,3% |
| S2.0 | Training | 82,5% | 1,5% |
| Test | 61,7% | 5,7% |
| S2.2 | Training | 84,8% | 2,0% |
| Test | 67,7% | 6,6% |
| All sensors | Training | 93,5% | 1,2% |
| Test | 82,7% | 5,6% |
| Recall | S1.4 | Training | 73,6% | 5,8% |
| Test | 58,7% | 9,9% |
| S1.7 | Training | 82,1% | 6,4% |
| Test | 50,3% | 11,2% |
| S2.0 | Training | 83,5% | 4,0% |
| Test | 66,6% | 9,7% |
| S2.2 | Training | 86,3% | 3,2% |
| Test | 68,3% | 12,2% |
| All sensors | Training | 92,7% | 1,7% |
| Test | 83,9% | 8,0% |
| Precision | S1.4 | Training | 90,9% | 2,8% |
| Test | 71,3% | 13,1% |
| S1.7 | Training | 91,4% | 2,6% |
| Test | 59,7% | 11,1% |
| S2.0 | Training | 83,4% | 2,4% |
| Test | 62,6% | 7,9% |
| S2.2 | Training | 83,0% | 3,0% |
| Test | 66,1% | 10,4% |
| All sensors | Training | 94,8% | 1,6% |
| Test | 83,5% | 7,3% |
| F1 score | S1.4 | Training | 81,1% | 3,1% |
| Test | 63,7% | 9,0% |
| S1.7 | Training | 86,3% | 3,2% |
| Test | 53,5% | 8,3% |
| S2.0 | Training | 83,3% | 1,7% |
| Test | 64,0% | 6,1% |
| S2.2 | Training | 84,5% | 1,8% |
| Test | 66,1% | 8,0% |
| All sensors | Training | 93,7% | 1,1% |
| Test | 83,3% | 5,4% |

**A Learning Curves for Logistic Regression model**


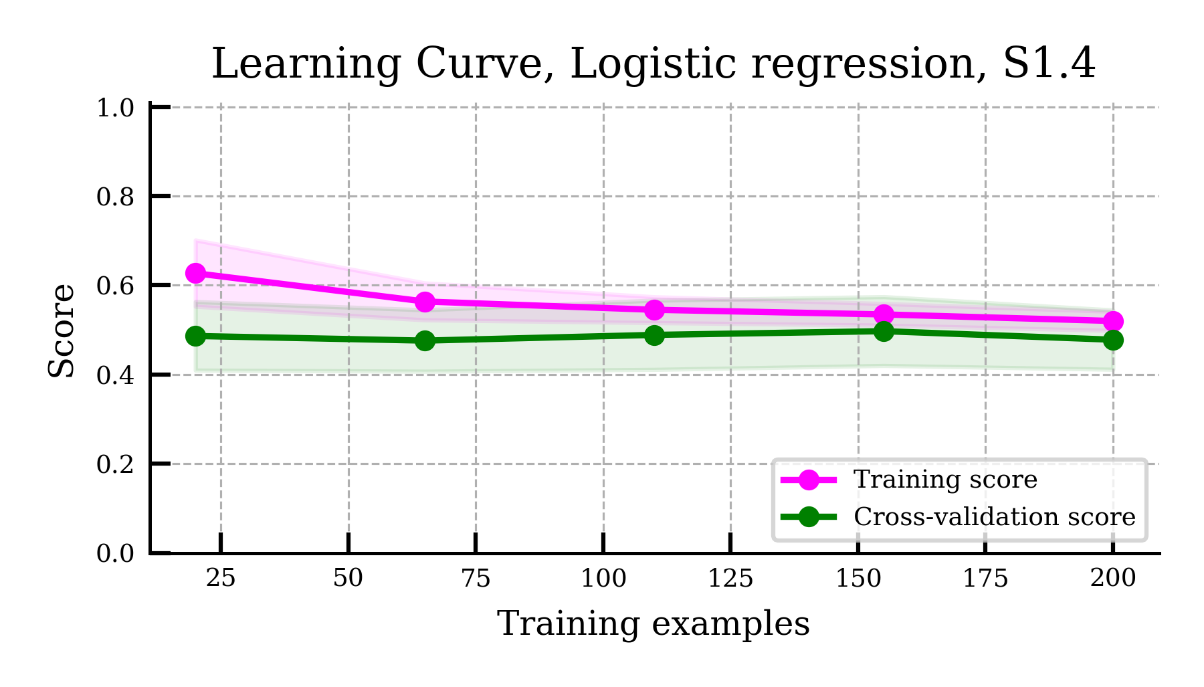


**Figure S1.** Learning Curve for Logistic Regression model, sensor S1.4.


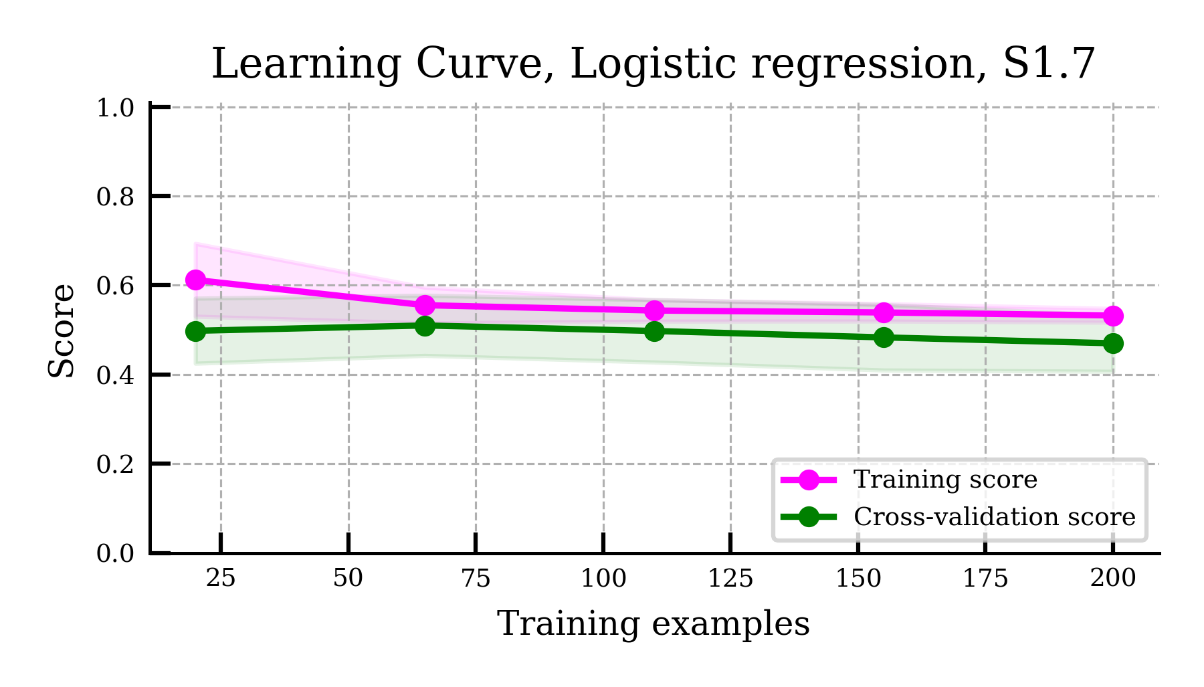


**Figure S2.** Learning Curve for Logistic Regression model, sensor S1.7.


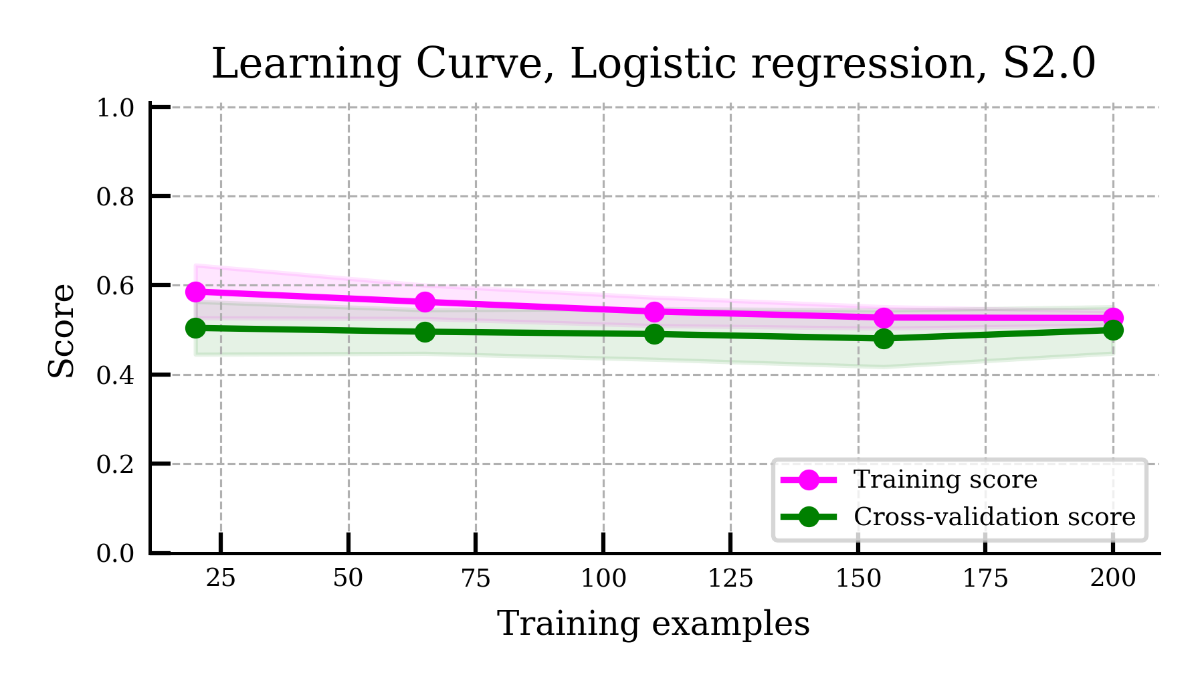


**Figure S3.** Learning Curve for Logistic Regression model, sensor S2.0.


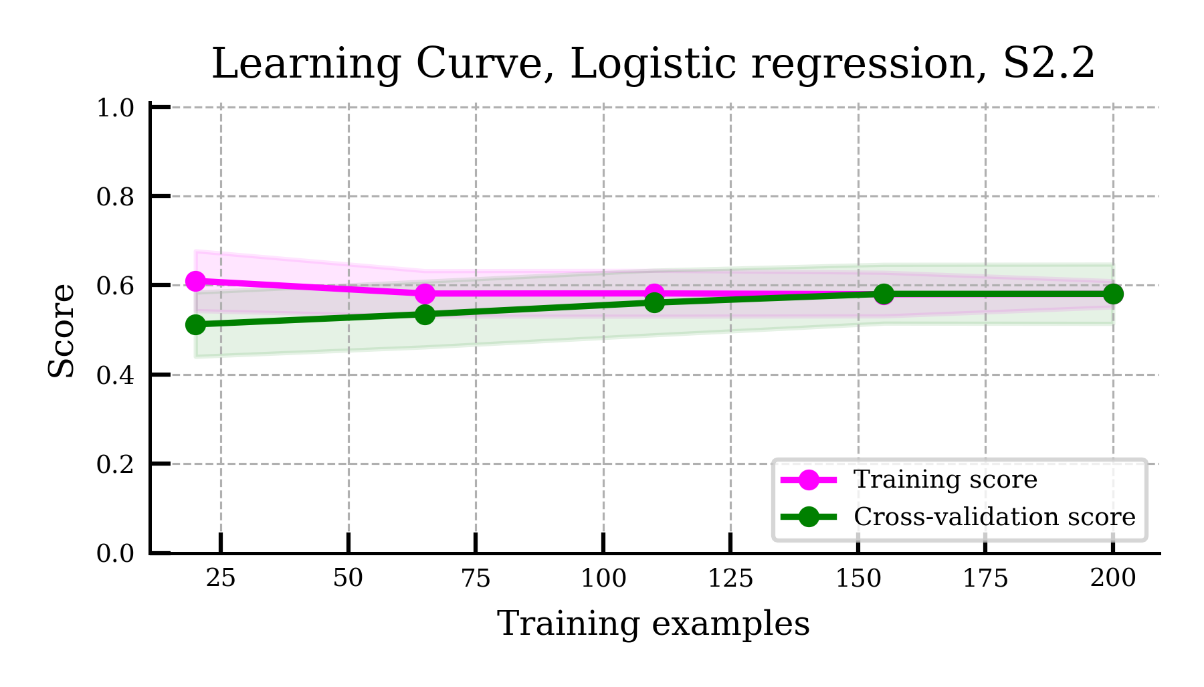


**Figure S4.** Learning Curve for Logistic Regression model, sensor S2.2.


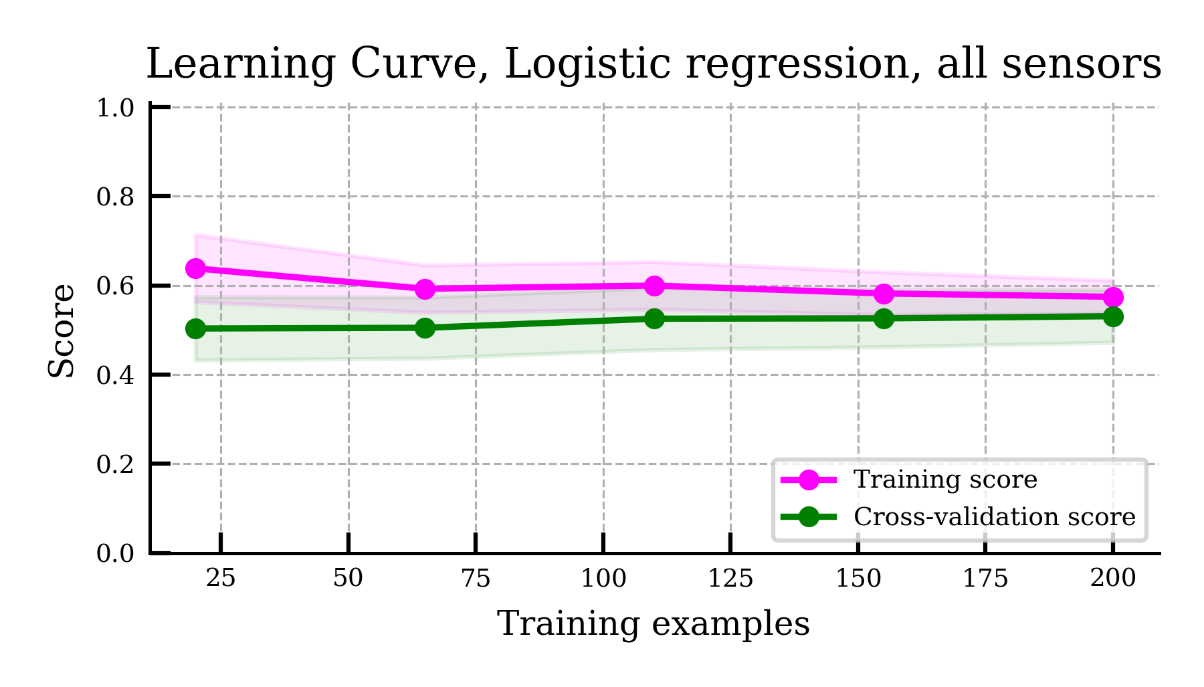


**Figure S5.** Learning Curve for Logistic Regression model, all sensors.

**B Learning Curves for Decision Tree model**


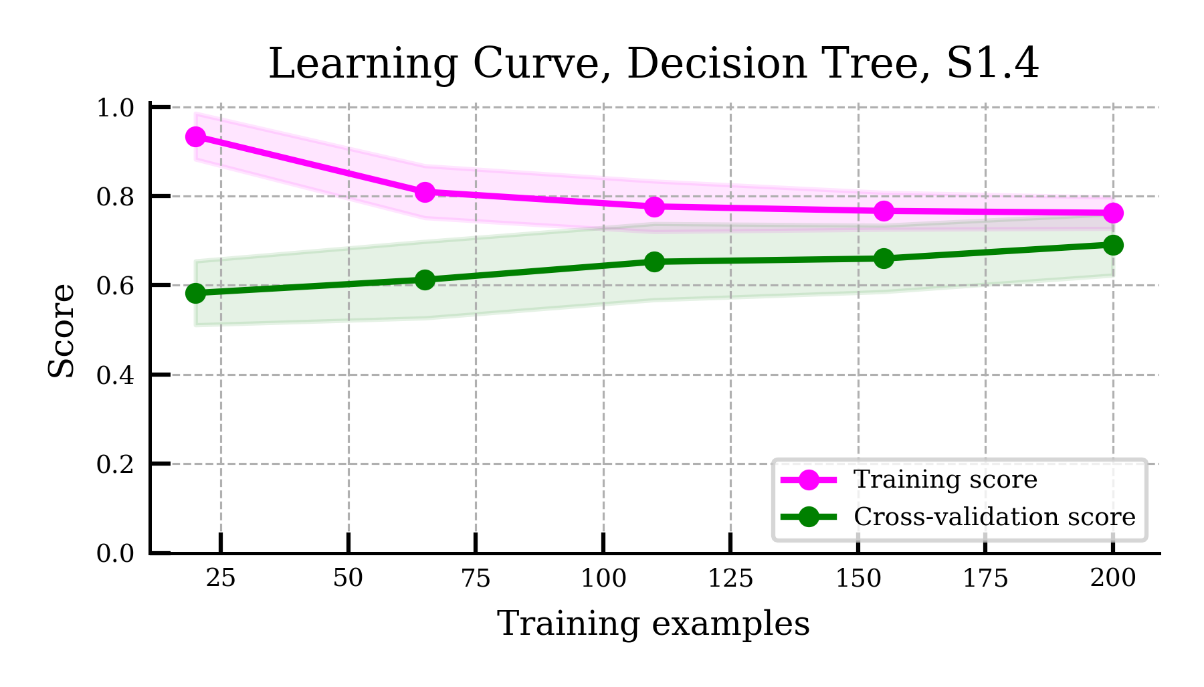


**Figure S6.** Learning Curve for Decision Tree model, sensor S1.4.


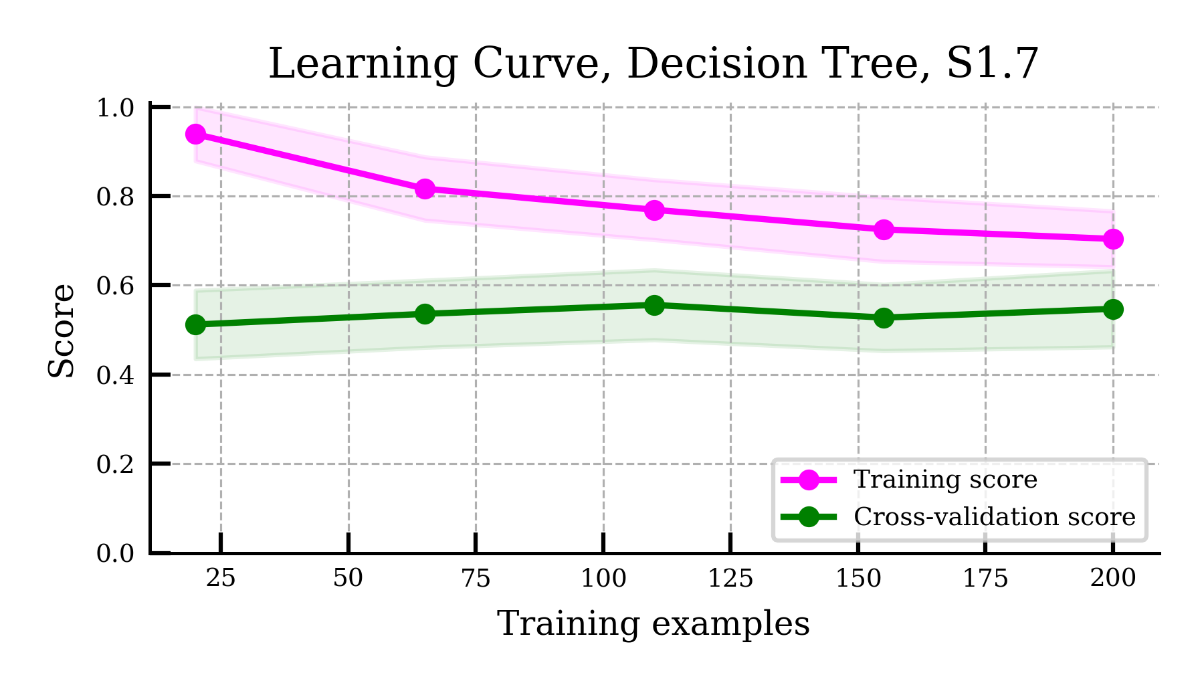


**Figure S7.** Learning Curve for Decision Tree model, sensor S1.7.


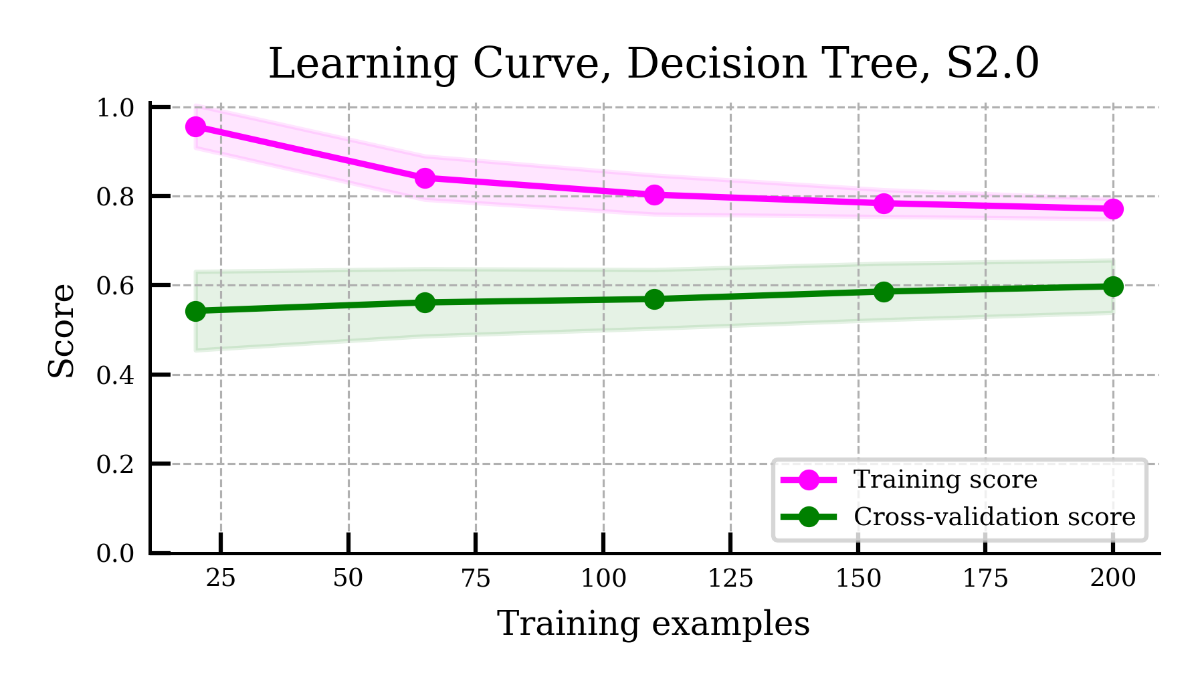


**Figure S8.** Learning Curve for Decision Tree model, sensor S2.0.


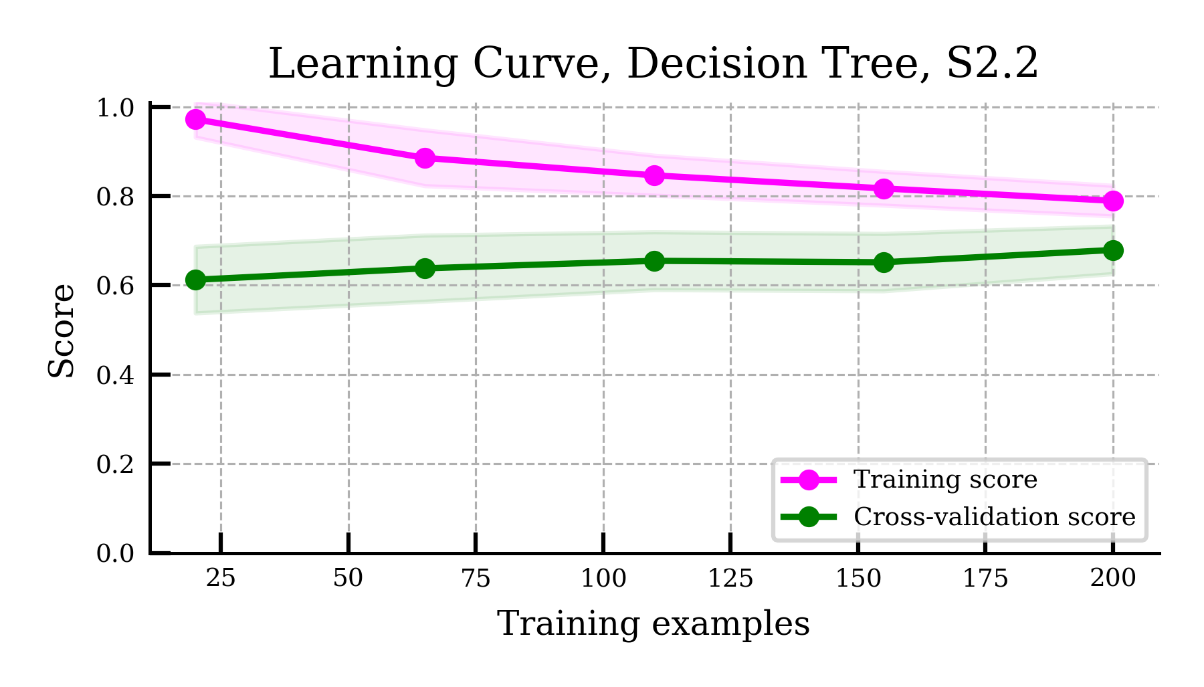


**Figure S9.** Learning Curve for Decision Tree model, sensor S2.2.


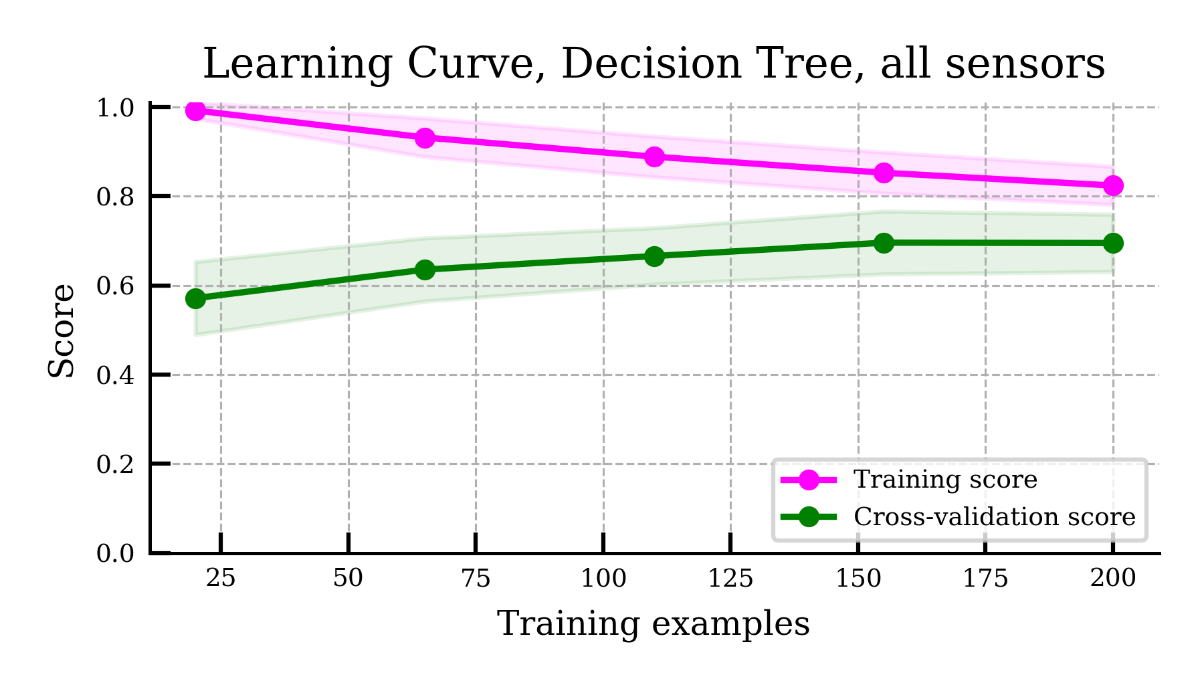


**Figure S10.** Learning Curve for Decision Tree model, all sensors.

**C Learning Curves for k-Nearest-Neighbors model**


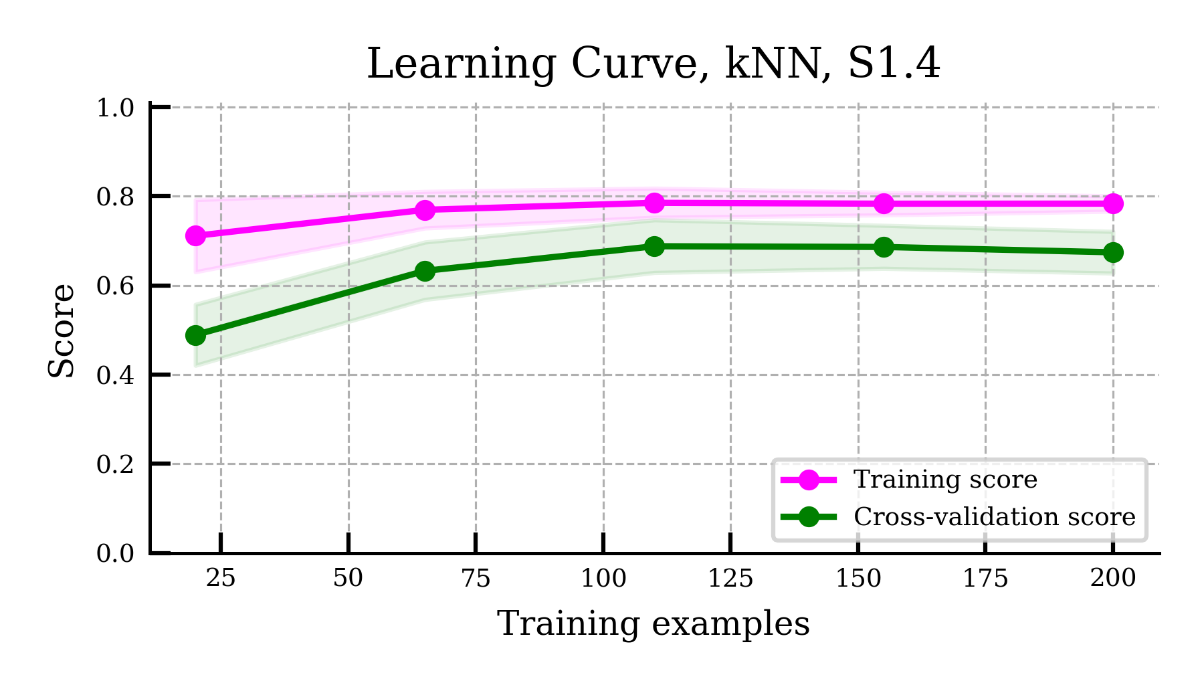


**Figure S11.** Learning Curve for k-Nearest-Neighbors model, sensor S1.4.


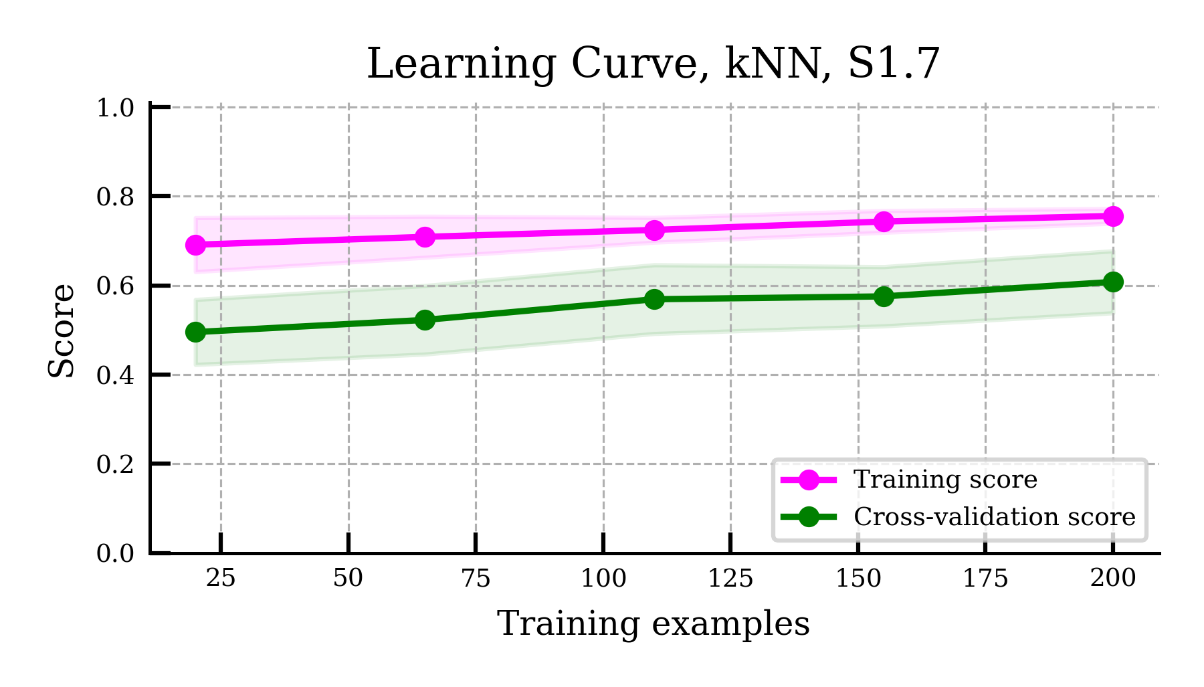


**Figure S12.** Learning Curve for k-Nearest-Neighbors model, sensor S1.7.


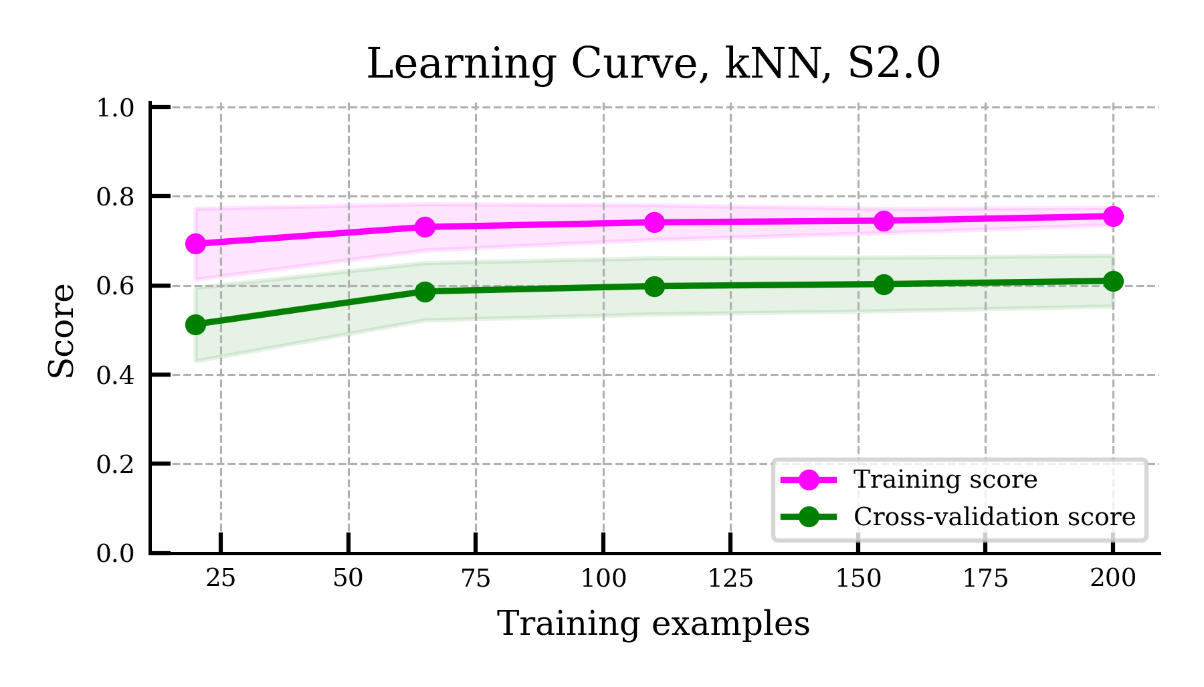


**Figure S13.** Learning Curve for k-Nearest-Neighbors model, sensor S2.0.


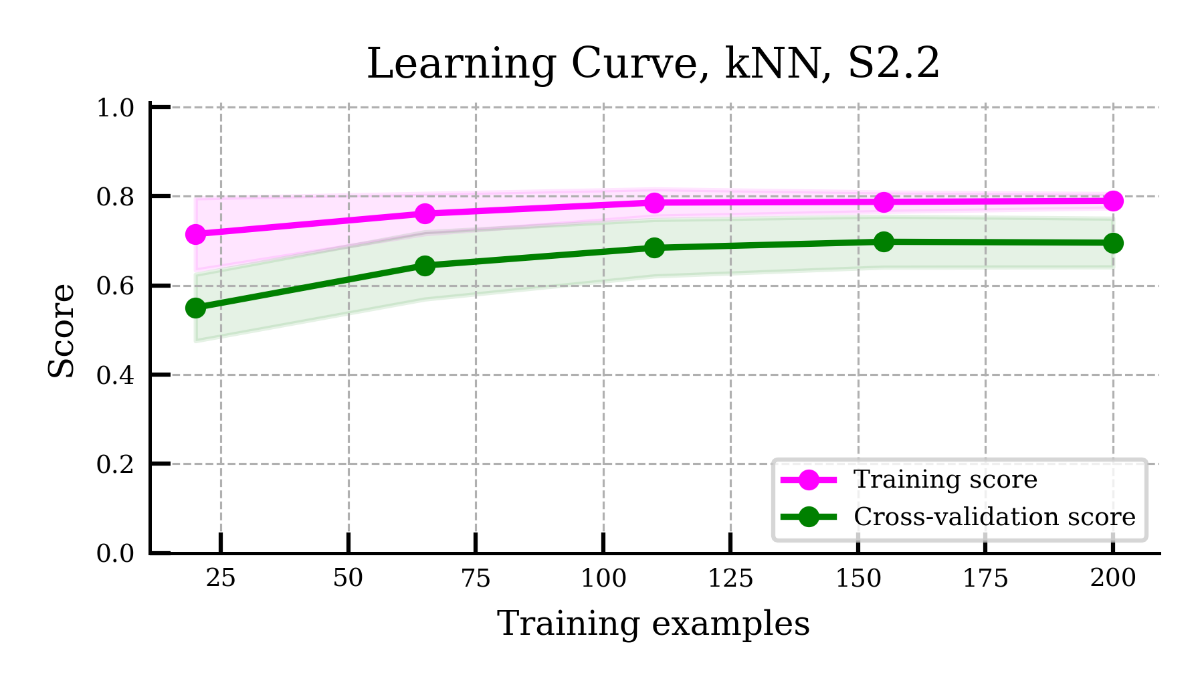


**Figure S14.** Learning Curve for k-Nearest-Neighbors model, sensor S2.2.


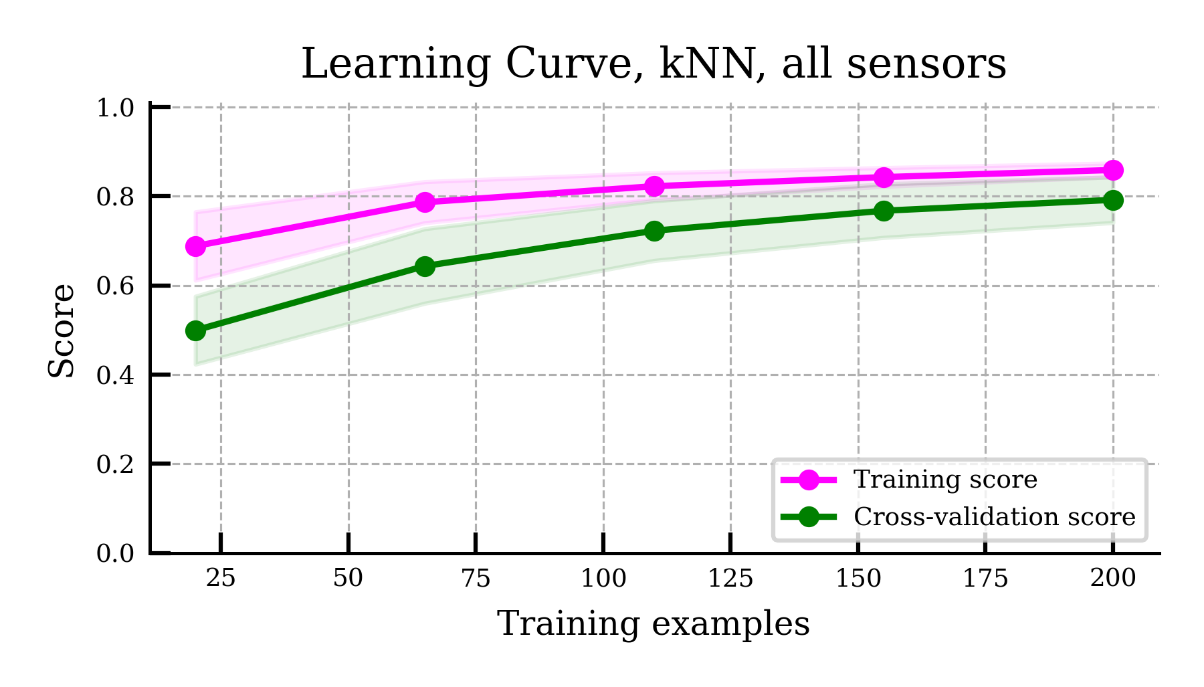


**Figure S15.** Learning Curve for k-Nearest-Neighbors model, all sensors.

**D Learning Curves for Linear Discriminant Analysis model**


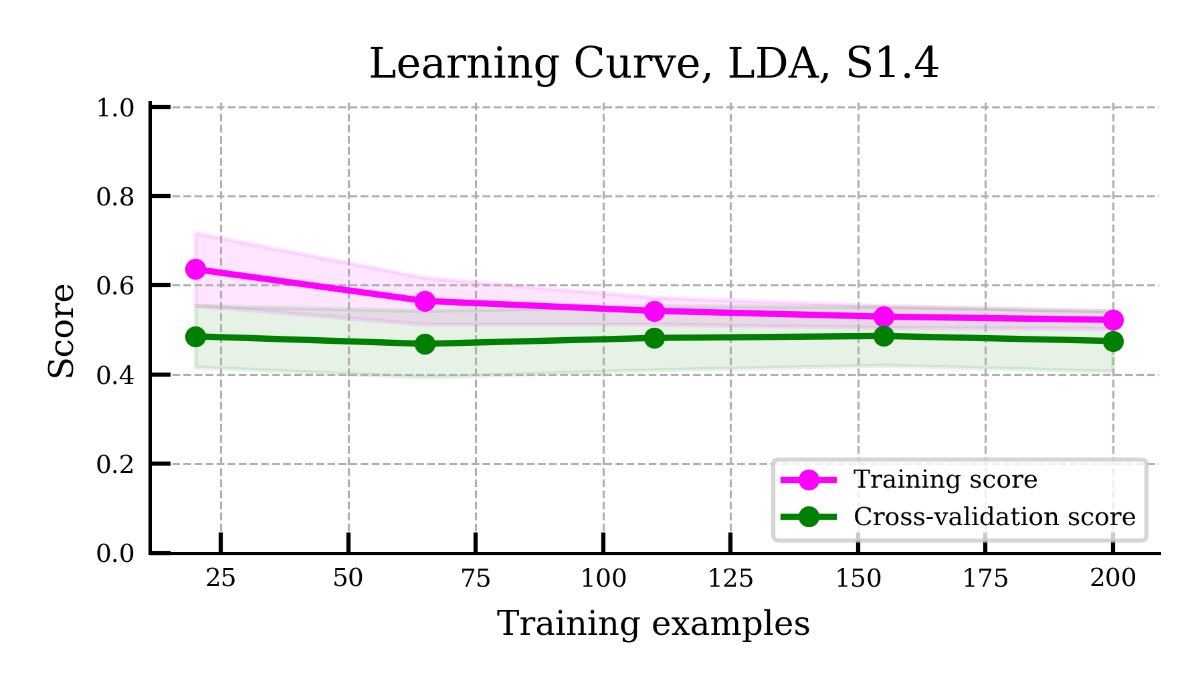


**Figure S16.** Learning Curve for Linear Discriminant Analysis model, sensor S1.4.


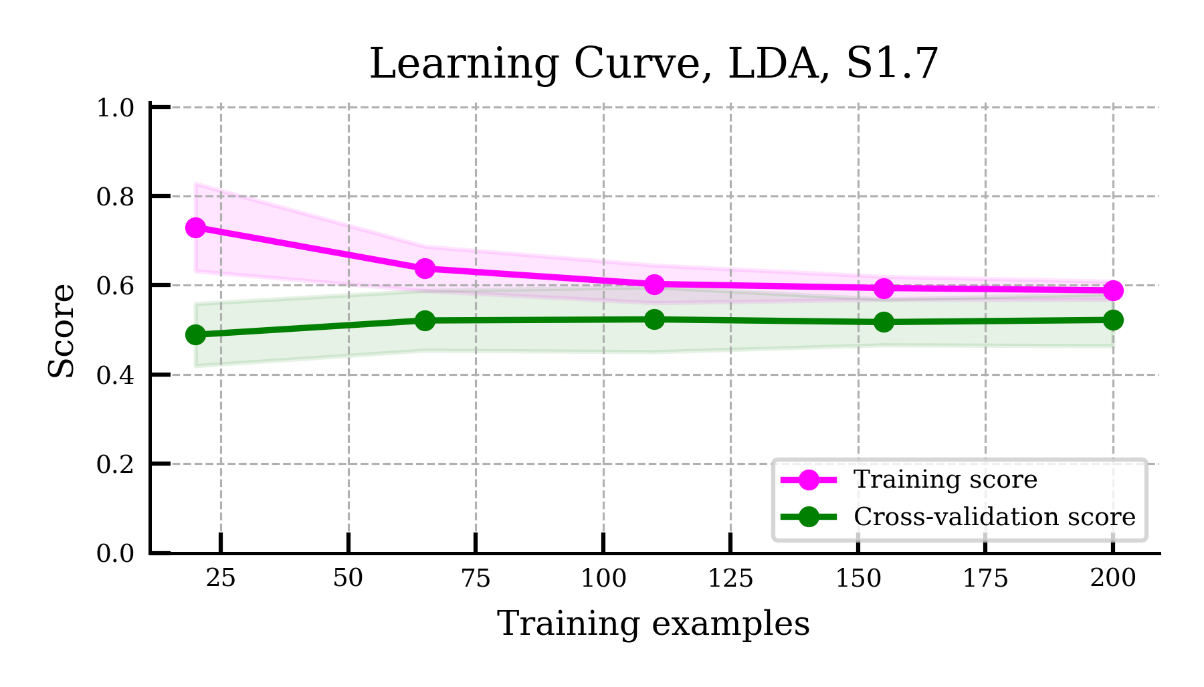


**Figure S17.** Learning Curve for Linear Discriminant Analysis model, sensor S1.7.


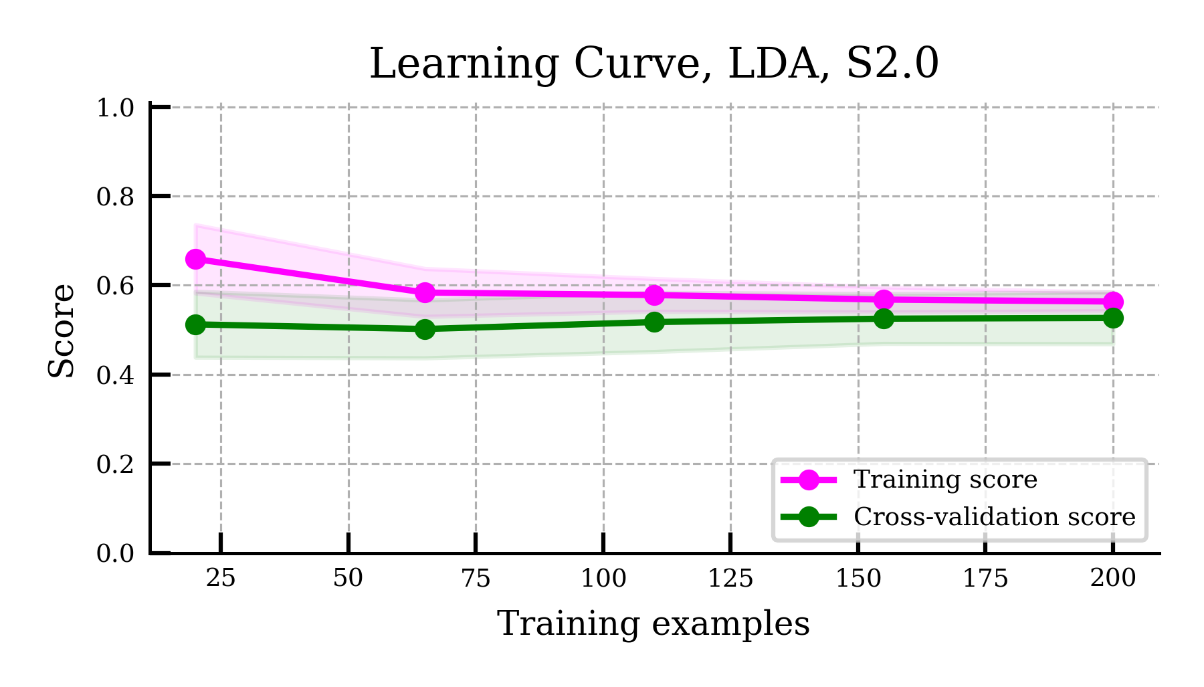


**Figure S18.** Learning Curve for Linear Discriminant Analysis model, sensor S2.0.


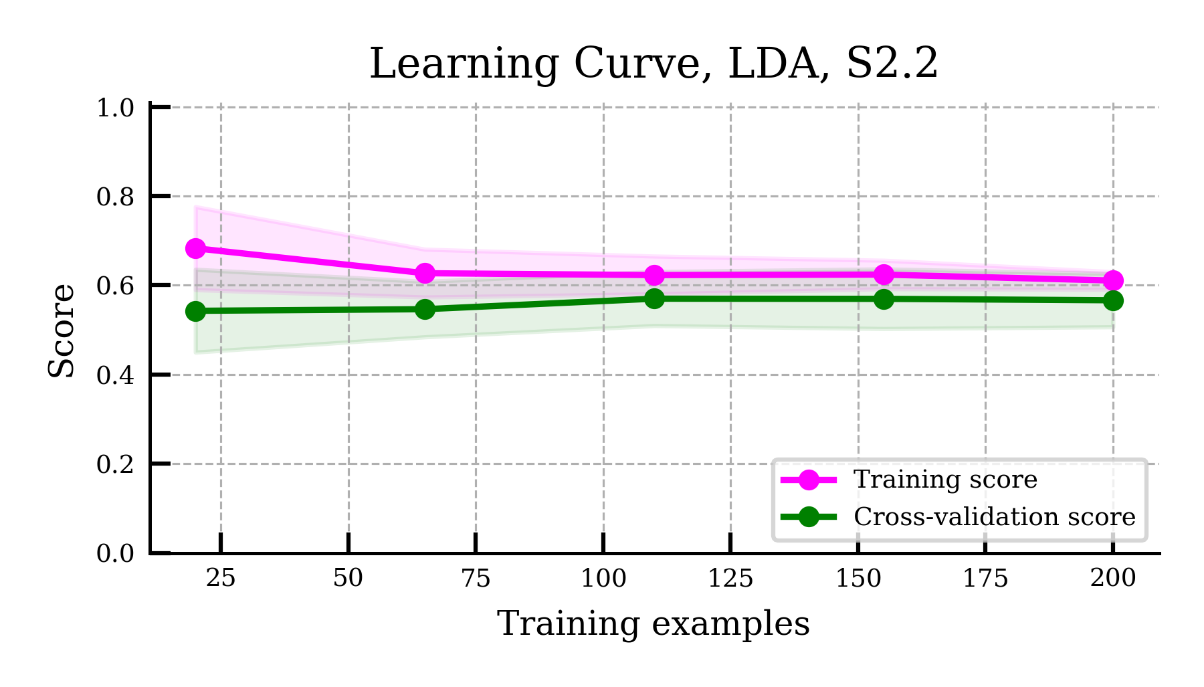


**Figure S19.** Learning Curve for Linear Discriminant Analysis model, sensor S2.2.


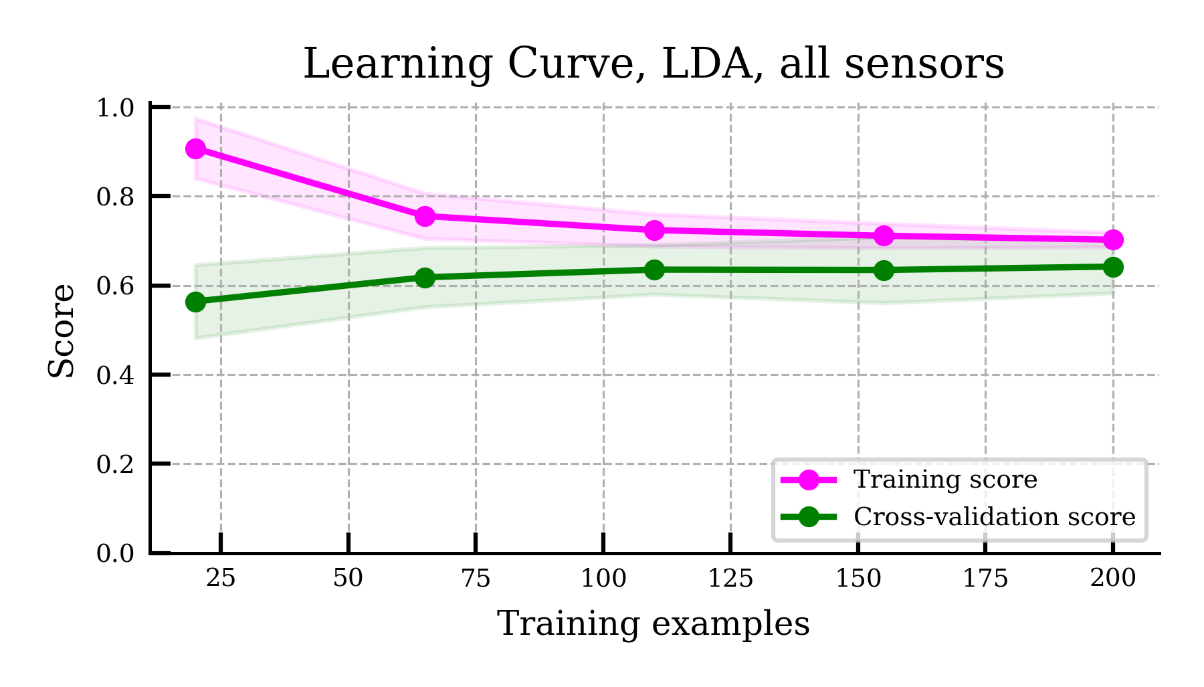


**Figure S20.** Learning Curve for Linear Discriminant Analysis model, all sensors.

**E Learning Curves for Gaussian Naïve Bayes model**


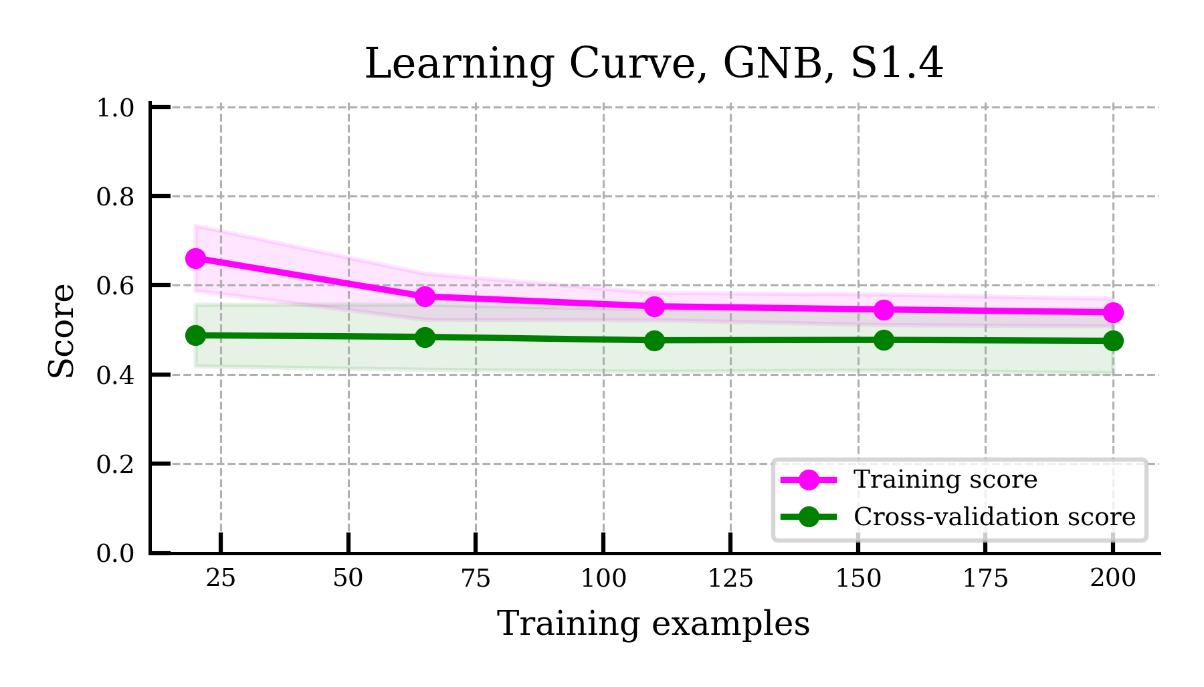


**Figure S21.** Learning Curve for Gaussian Naïve Bayes model, sensor S1.4.


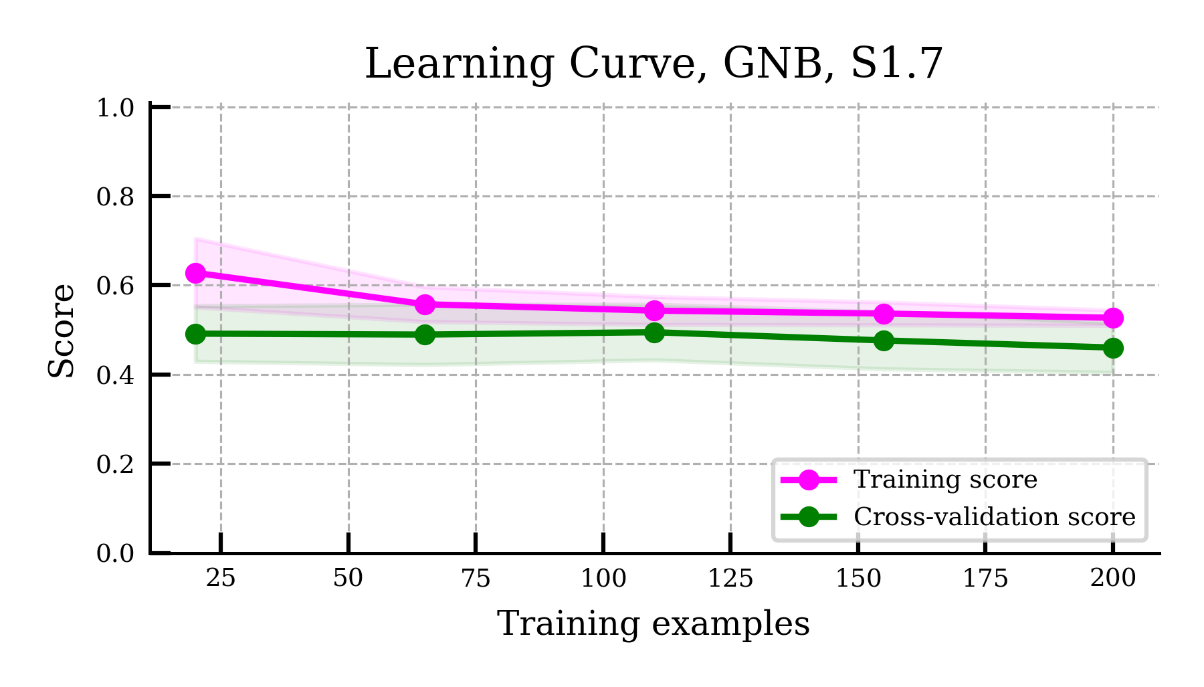


**Figure S22.** Learning Curve for Gaussian Naïve Bayes model, sensor S1.7.


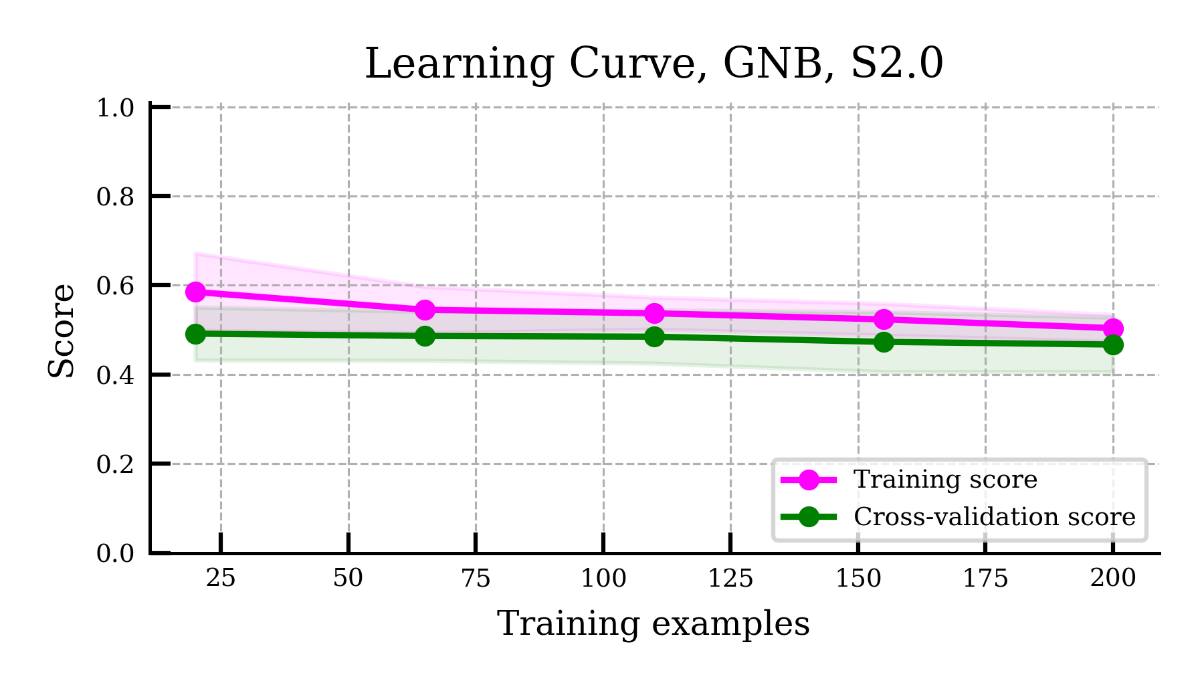


**Figure S23.** Learning Curve for Gaussian Naïve Bayes model, sensor S2.0.


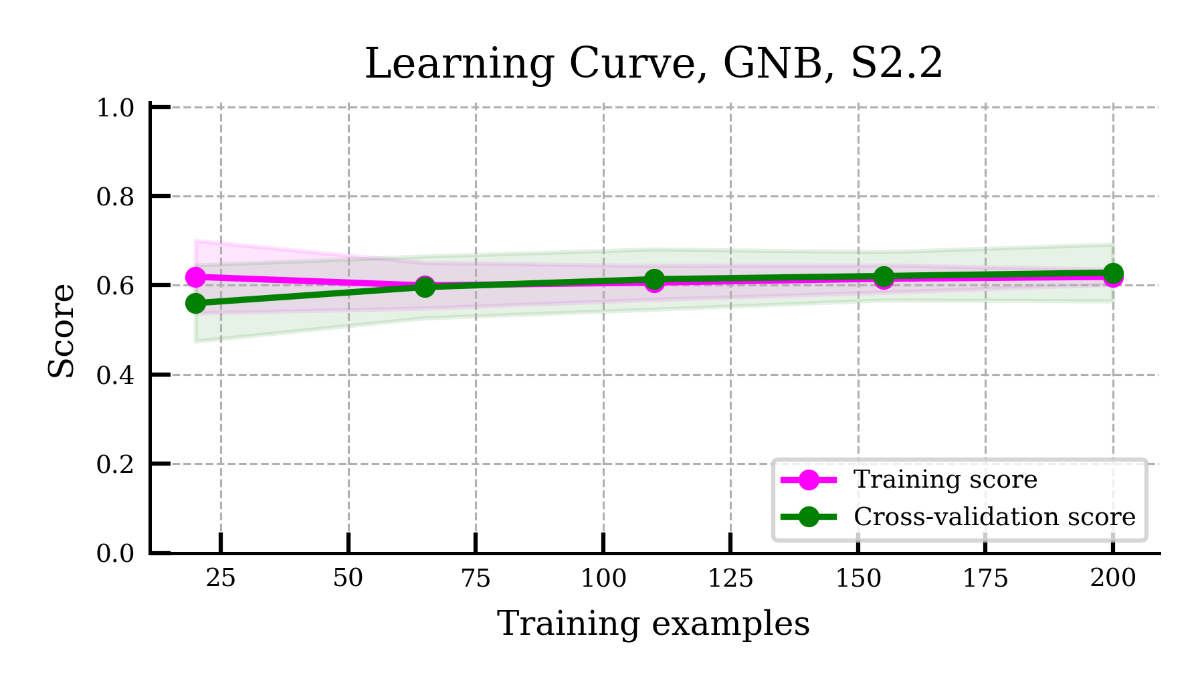


**Figure S24.** Learning Curve for Gaussian Naïve Bayes model, sensor S2.2.


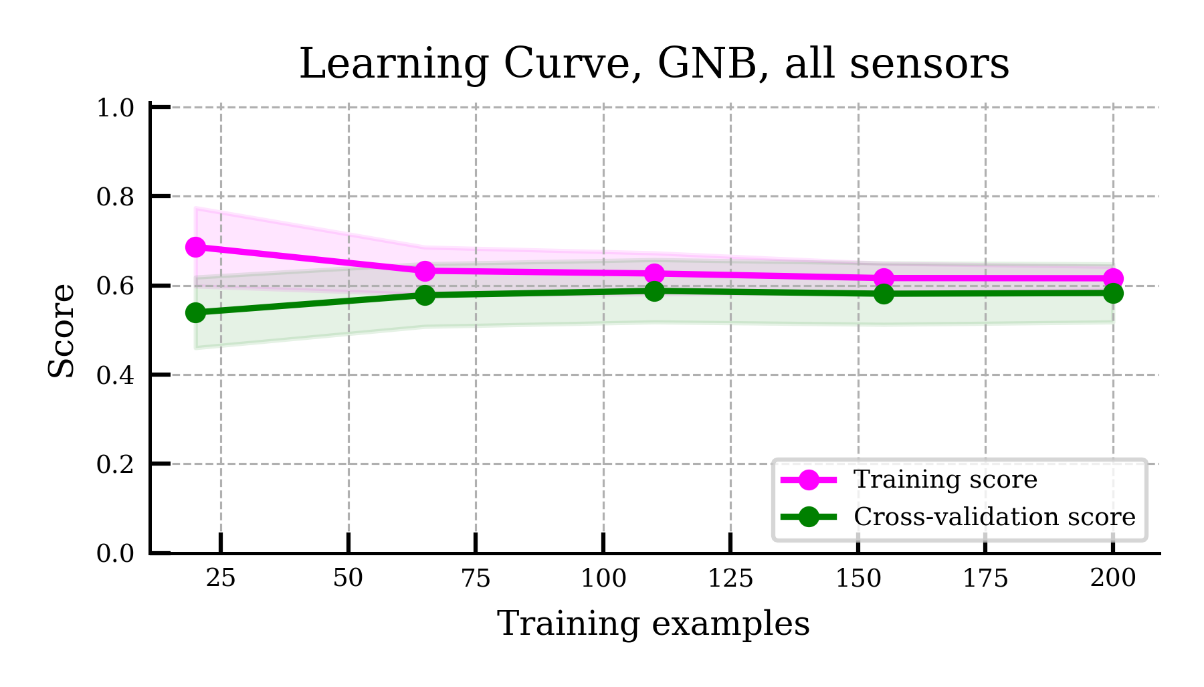


**Figure S25.** Learning Curve for Gaussian Naïve Bayes model, all sensors.

**F Learning Curves for Support Vector Machine model**


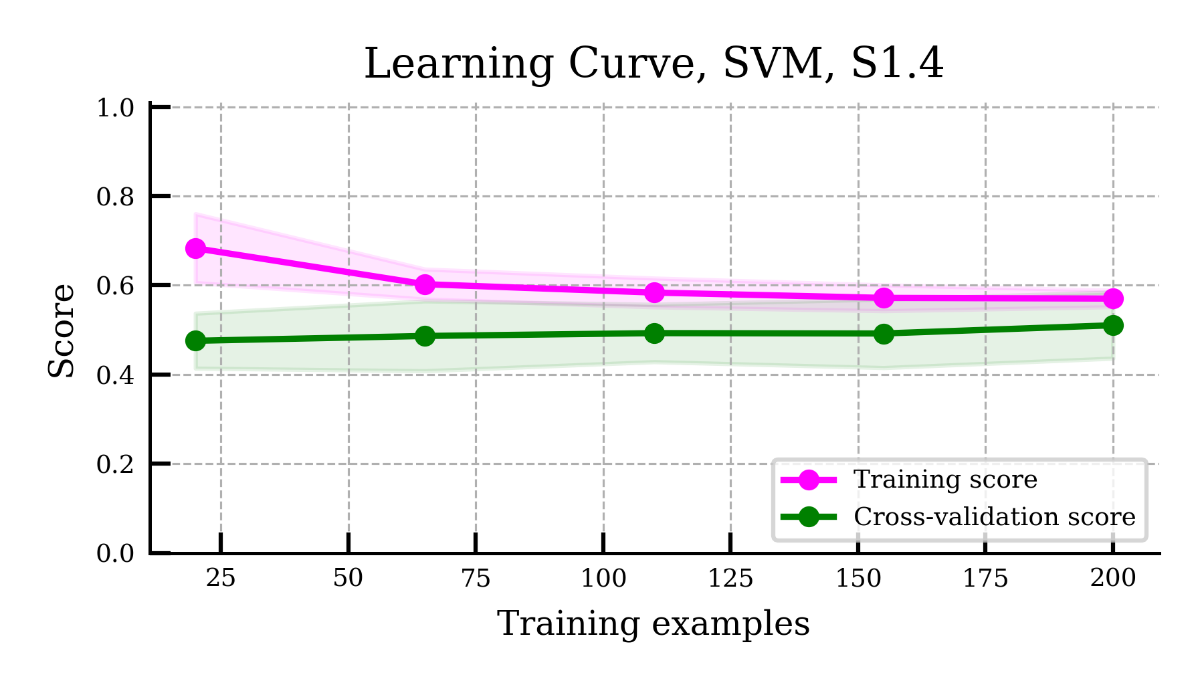


**Figure S26.** Learning Curve for Support Vector Machine model, sensor S1.4.


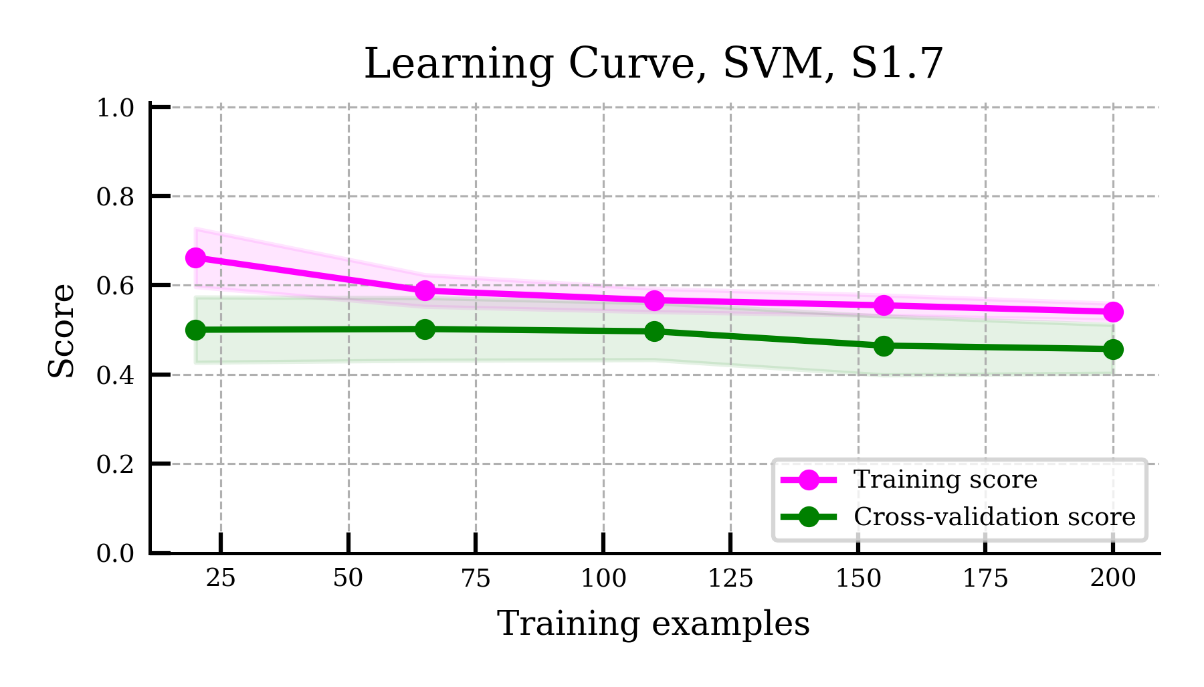


**Figure S27.** Learning Curve for Support Vector Machine model, sensor S1.7.


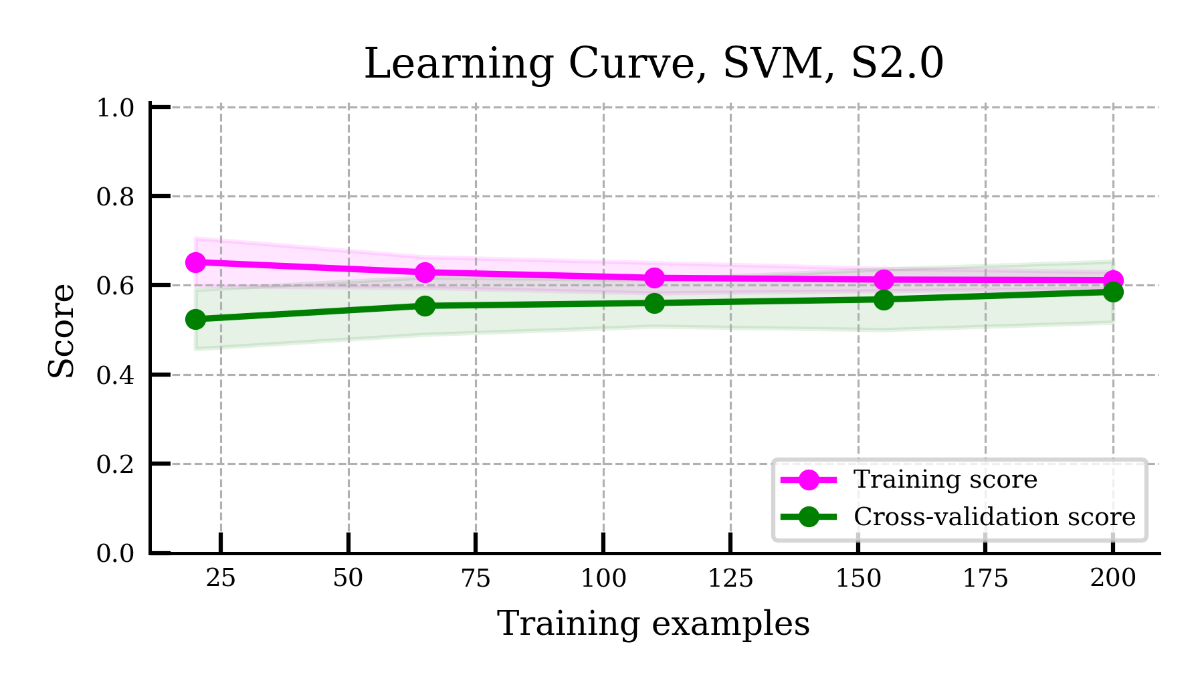


**Figure S28.** Learning Curve for Support Vector Machine model, sensor S2.0.


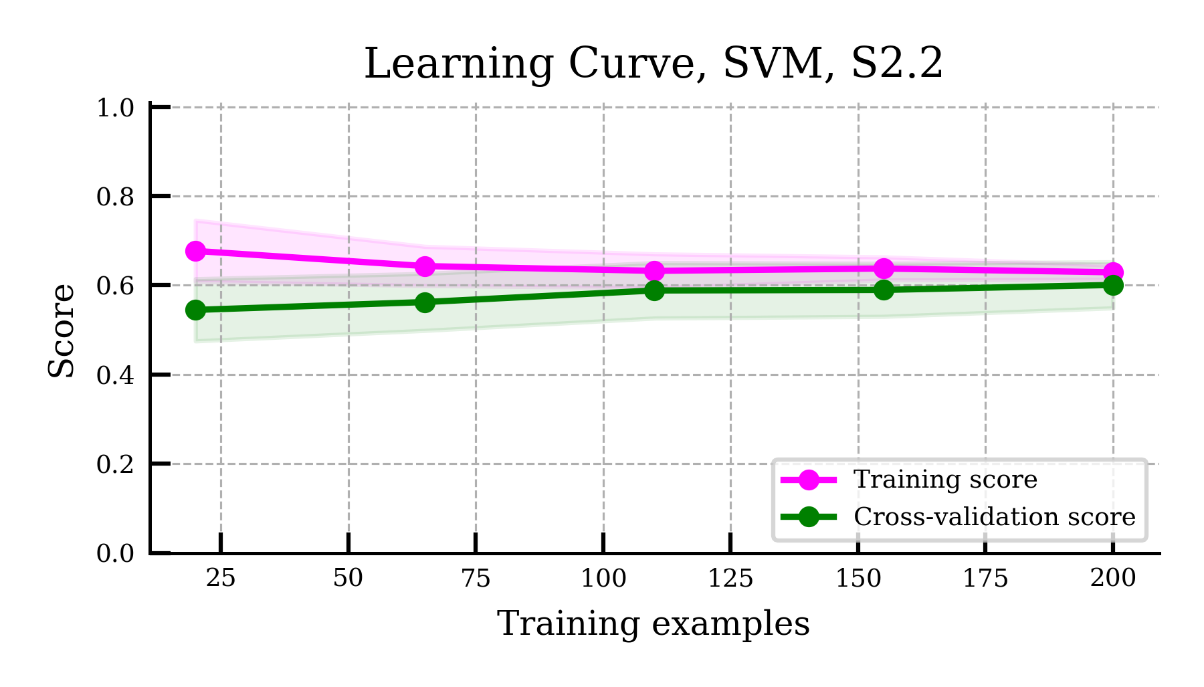


**Figure S29.** Learning Curve for Support Vector Machine model, sensor S2.2.


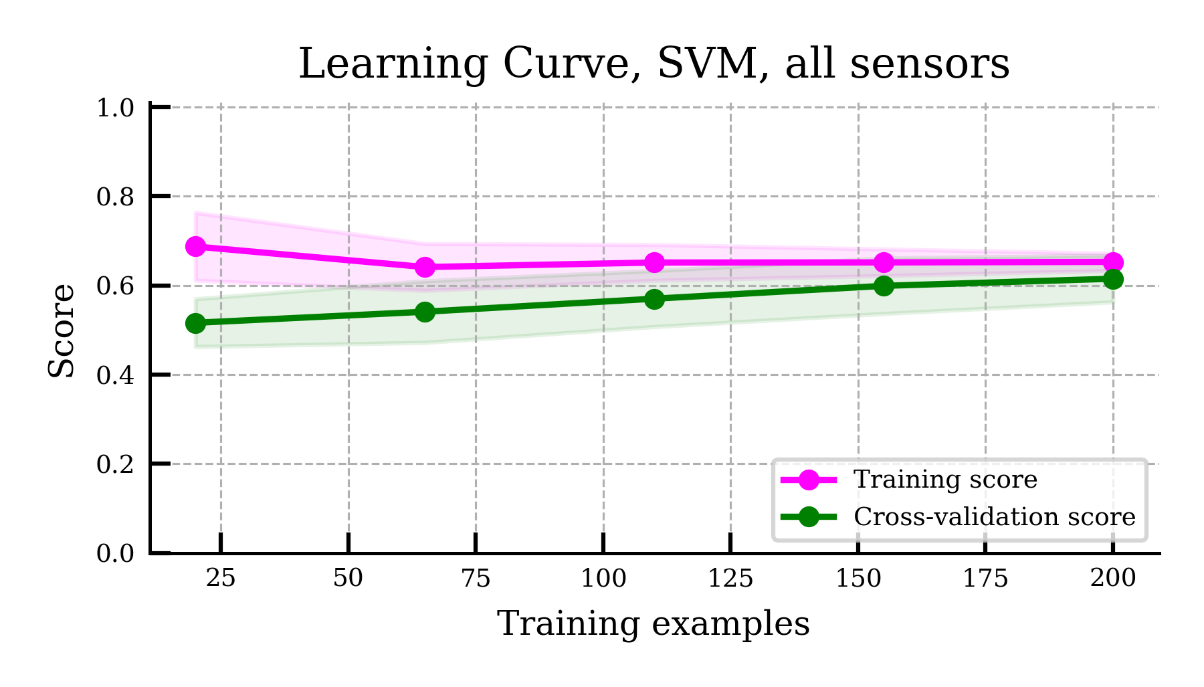


**Figure S30.** Learning Curve for Support Vector Machine model, all sensors.

**G Learning Curves for Random Forest model**


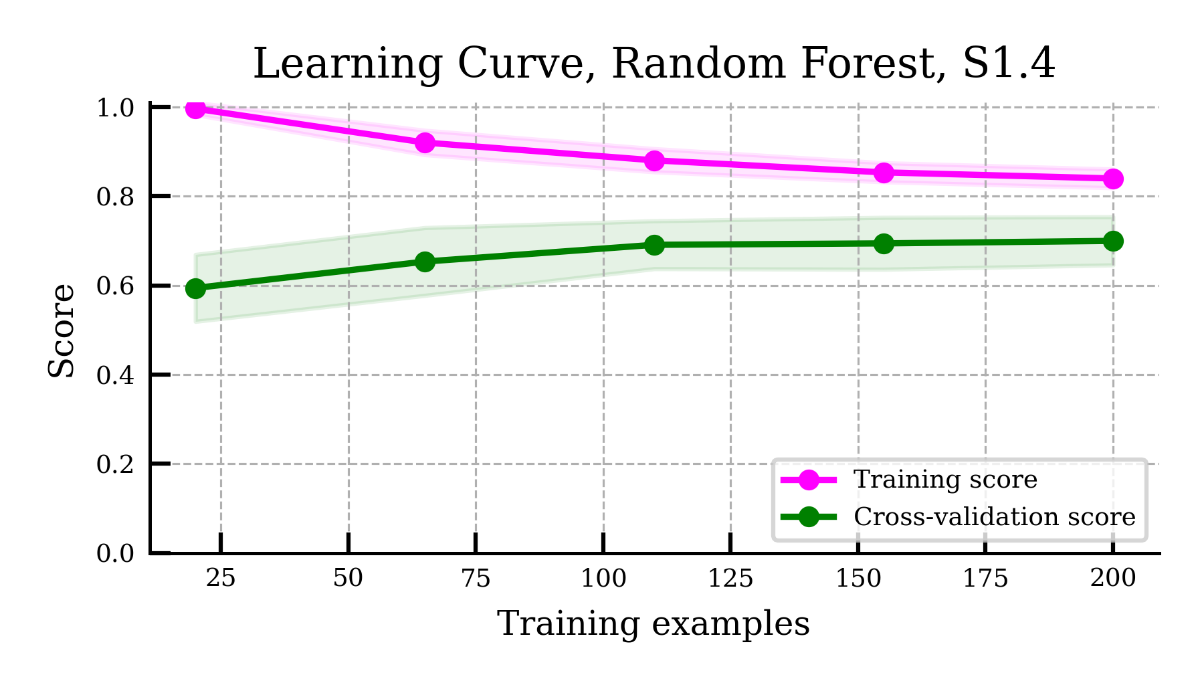


**Figure S31.** Learning Curve for Random Forest model, sensor S1.4.


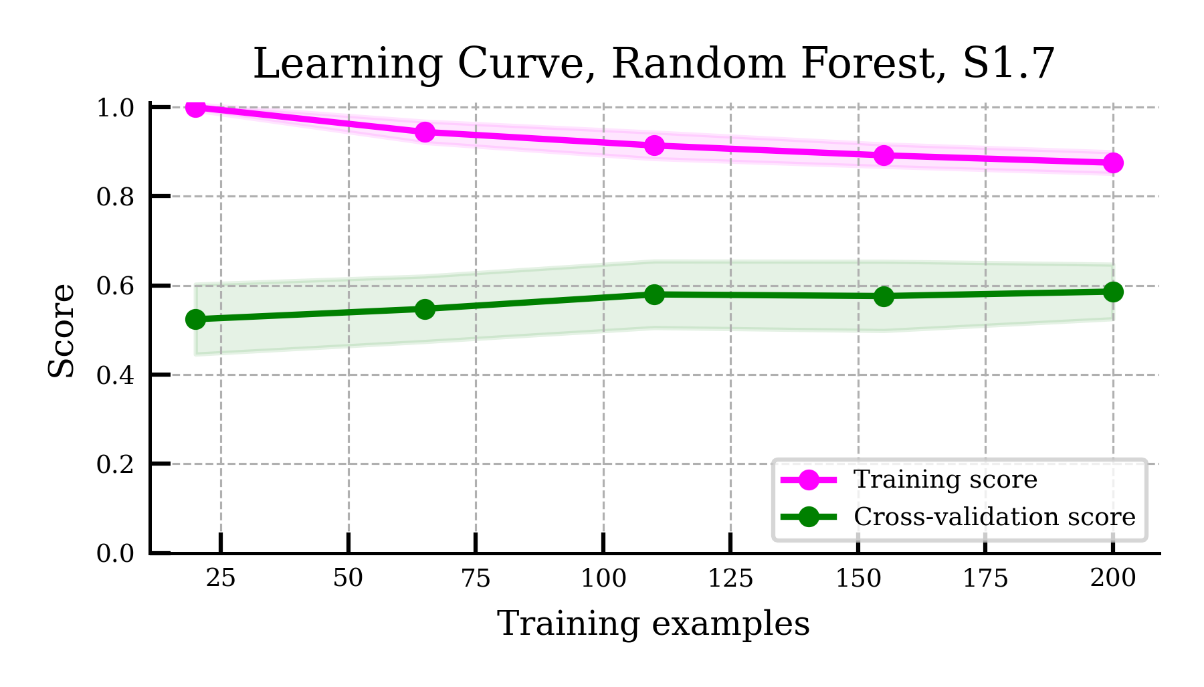


**Figure S32.** Learning Curve for Random Forest model, sensor S1.7.


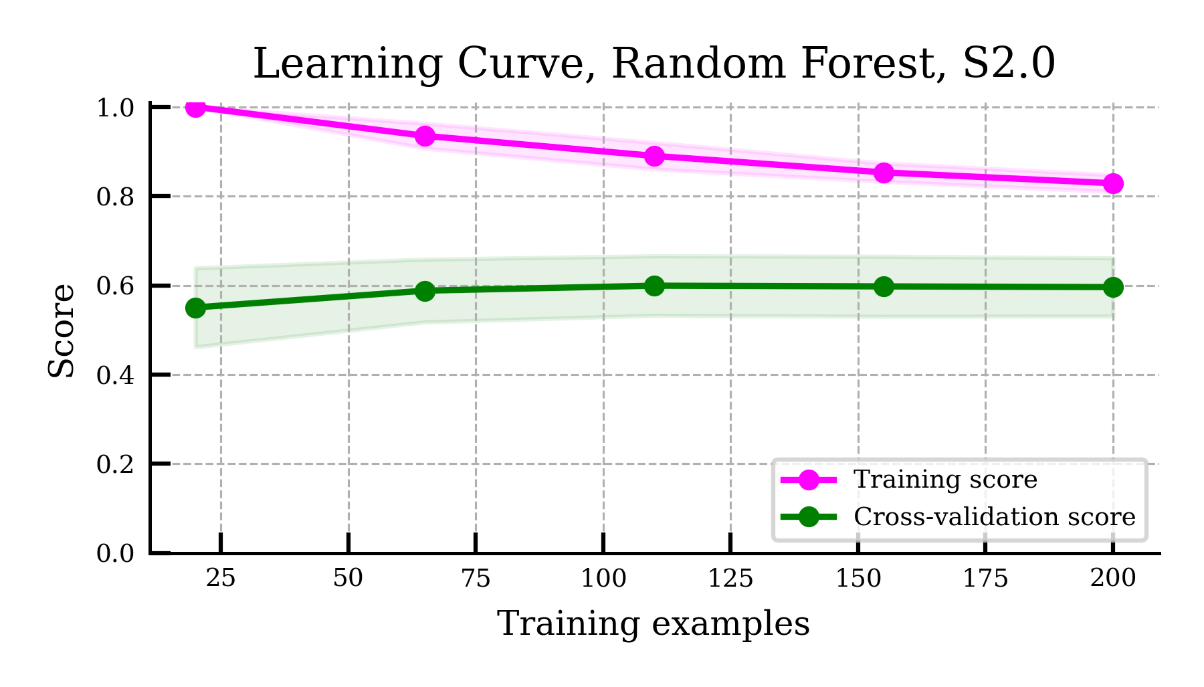


**Figure S33.** Learning Curve for Random Forest model, sensor S2.0.


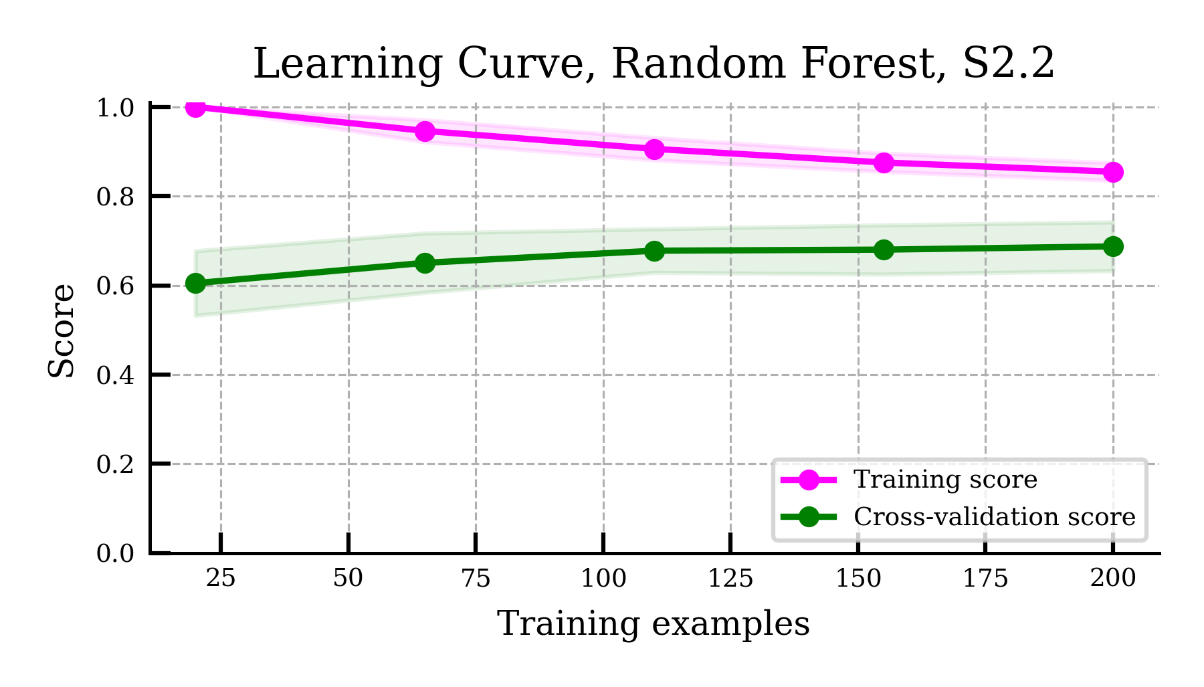


**Figure S34.** Learning Curve for Random Forest model, sensor S2.2.


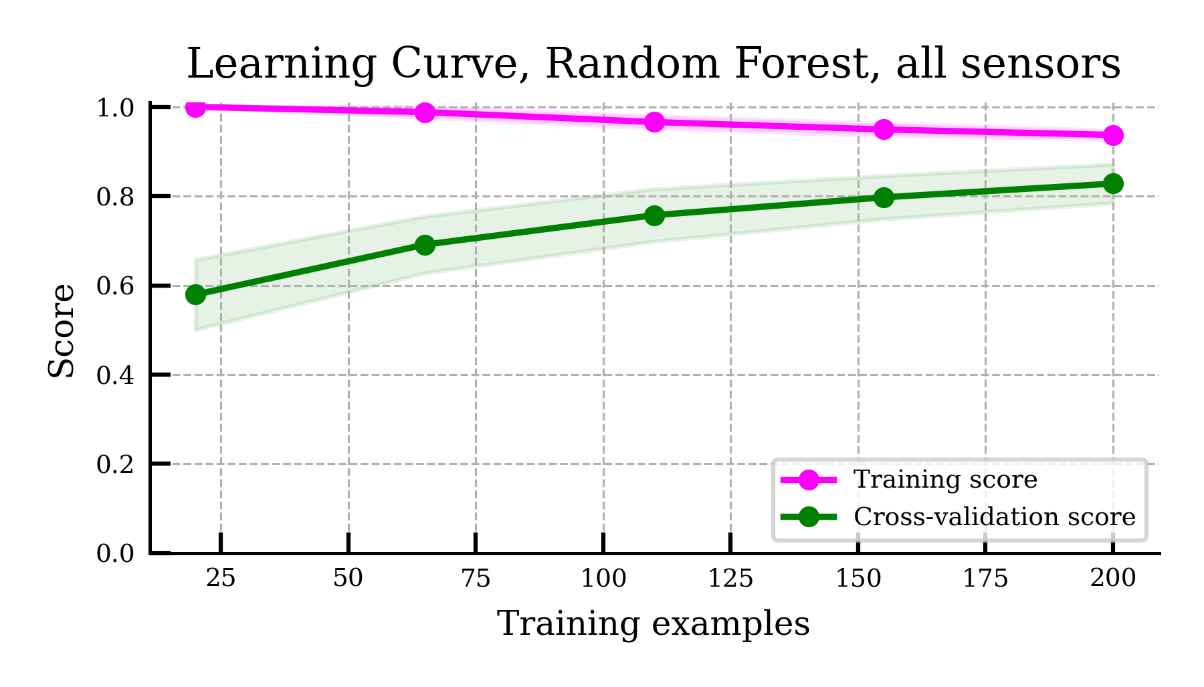


**Figure S35.** Learning Curve for Random Forest model, all sensors.
